# Supplementary material
Source: PubMed Central journal article supplement (PMC7395438)
Supplement: pnas.2002427117.sapp.pdf [file pnas.2002427117.sapp.pdf]

Supplementary Information for

## **Regulation of stem cell function and neuronal differentiation by HERV-K via mTOR pathway**

*Tongguang Wang, Marie Medynets, Kory R. Johnson, Tara T. Doucet-O'Hare, Brianna DiSanza, Wenxue Li, Yadi Xu, Anna Bagnell, Richa Tyagi, Kevon Sampson, Nasir Malik, Joseph Steiner, Alina Hadegan, Jeffrey Kowalak, James O'Malley, Dragan Maric, Avindra Nath<sup>#</sup>*

<sup>#</sup>correspondence:

Avindra Nath,  
Email: [natha@ninds.nih.gov](mailto:natha@ninds.nih.gov)

### **SI Methods:**

#### **RNA-Seq analysis**

RNA-Seq analysis was performed on the iPSC lines NCRM1, NCRM5, and ND2.0.

RNA-Seq analysis was also conducted on NSCs that were derived from NCRM1 and BC1 iPSCs and the H14 embryonic stem cell line (1) and on neurons differentiated from these NSCs at the following time points: days 3, 5, 7, and 10. RNA-Seq data from the XCL1 NSC line (XCell Science, Novato, CA) was also used as part of the RNA-Seq data analysis. NSCs were derived from the pluripotent stem cell lines following the protocol described by Swistowski et al.(2) and neurons differentiated according to Efthymiou et al. (3). Cells were grown in one well of a 6-well dish, samples processed at indicated time points, and total RNA extracted with the RNeasy Mini Kit (Qiagen, Redwood City, CA). RNA concentration and integrity were assessed with a BioAnalyzer (Agilent, Santa Clara, CA). RNA sequencing library was generated from the RNA by using the TruSeq SR RNA sample prep kit (Illumina, San Diego, CA) and single read sequenced on HiSeq 2000 (Illumina) for 50 cycles. Post CASAVA deplexing, fastq files

generated per library were imported into the CLCbio Genomics Workbench (<https://digitalinsights.qiagen.com>) and adaptor clipped, QC inspected, quality trimmed, filtered, and mapped. Per quality trimming, 15bp from the 5' end of each read was globally removed along with 1bp from the 3' end. Bases with a call accuracy < 95% were also trim-removed. Per filtering, reads having more than two ambiguities were discarded along with those having read length <15bp post quality trimming. Per mapping, the "RNA-Seq" tool was used to locally align reads by library against the human genome (GRCh38/hg38) without masking; keeping only those mapped reads with  $\geq 80\%$  reference identity for  $\geq 80\%$  read length. Post mapping, the number of reads falling in a RepeatMasker annotated "HERV" region (Library 20120124) were enumerated and the counts converted into "Reads Per Kilo base of transcript per Million mapped reads" ("RPKM") expression values. RPKM expression values were next organized by HERV region across libraries and imported into R (<https://cran.r-project.org/>). In R, RPKM expression values were pedestal by 2, Log<sub>2</sub> transformed, filtered to remove regions not having at least one transformed value >1, then quantile normalized. Normalized values for remaining regions were then used to assess for and remove library-level outliers via Tukey box plot, covariance-based PCA scatter plot, and Pearson correlation heat map. For libraries not removed as outliers, normalization of RPKM expression values was repeated and the new normalized expression noise modeled using LOWESS (CV~mean). Based on the LOWESS fit, regions not having at least one normalized value  $\geq 2.25$  were considered noise-biased and subsequently discarded as such. For regions not discarded, expression was floored to 2.25 if < 2.25 then subject to one-factor ANOVA testing under BH FDR MCC (BH: Benjamini-

Hochberg, FDR: False discovery rate, MCC: Matthews Correlation Coefficients) condition using sample type as the factor. Regions having a corrected  $P < 0.05$  by this test were subset and deemed to be those having differential expression across the sample types tested. For those regions subset only, the TukeyHSD post-hoc test was applied to identify which regions between sample types are differentially expressed ( $P < 0.05$  and an absolute difference of means  $\geq 2$ ).

### **Global DNA methylation analysis**

Induced neural stem cells and their corresponding iPSCs were lysed and genomic DNA was purified using a DNA purification kit (Clontech, Mountain View, CA) following the manufacturer's instructions. LINE-1 methylation level was used to represent the global DNA methylation level and was detected using the Global DNA methylation LINE-1 kit (Active Motif, Carlsbad, CA) per the manufacturer's instructions.

### **Liquid chromatography-mass spectrometry**

To determine the possible binding proteins with HML-2 Env, HML-2 Env magnetic beads were made by conjugating protein G magnet beads (50  $\mu$ l) with anti-Flag mAb (5  $\mu$ g, Sigma) for 30 mins. The beads were then incubated with cell lysates of HEK293 cells transfected with HML-2 Env FlagTag plasmid for 1 hour at room temperature, followed by incubation with cell lysates of iPSC. Immunoprecipitated samples were processed using an on-bead digestion (OBD) protocol (4) with minor changes. The OBD protocol yields 4 fractions per sample based on increasingly vigorous conditions. Briefly, proteins immobilized on magnetic beads were resuspended in 200  $\mu$ L 0.1M  $\text{NH}_4\text{HCO}_3$ , pH 8.0. Disulfide bonds were reduced by addition 1.0  $\mu$ L 1M dithiothreitol (DTT, final concentration = 5 mM) and incubating at 50°C for 30 min. The supernatant was

decanted from the beads and transferred to a 1.5 mL microfuge tube (fraction 1) and a fresh aliquot of 200  $\mu\text{L}$  0.1M  $\text{NH}_4\text{HCO}_3$ , pH 8.0 was added to the magnetic beads. Thiol moieties were alkylated by addition of 9.0  $\mu\text{L}$  0.29M iodoacetamide (IAM, final concentration = 12.5 mM) to both fraction 1 and the resuspended magnetic beads and incubating at room temp for 30 min in the dark. Proteins were digested by adding 10  $\mu\text{L}$  trypsin (10 ng/ $\mu\text{L}$ ) and incubating at 50°C for 4 hr. The supernatant was decanted from the magnetic beads and transferred to a 1.5 mL microfuge tube (fraction 2). The magnetic beads resuspended in 200  $\mu\text{L}$  2M urea, 0.1M  $\text{NH}_4\text{HCO}_3$ , pH 8.0. Proteins were further digested by adding 10  $\mu\text{L}$  trypsin (10 ng/ $\mu\text{L}$ ) to fractions 1, 2, and the magnetic beads, and incubating at 37°C overnight. The supernatant was decanted from the magnetic beads and transferred to a 1.5 mL microfuge tube (fraction 3). The magnetic beads were resuspended in 200  $\mu\text{L}$  80%  $\text{CH}_3\text{CN}$ , 0.1% trifluoroacetic acid (TFA) and sonicated for 30 min. The supernatant was decanted from the magnetic beads and transferred to a 1.5 mL microfuge tube (fraction 4) and dried in a vacuum centrifuge.

Fractions 1 – 3 were acidified by the addition of 1.0  $\mu\text{L}$  TFA, while fraction 4 was resolubilized in 200  $\mu\text{L}$  5%  $\text{CH}_3\text{CN}$ , 0.1% TFA. All fractions were desalted by solid phase extraction using Targa C18 microspin columns (PN: SEM SS18R; The Nest Group, Inc., Southborough, MA) according to the manufacturer's instructions.

Nanoflow LC-MS/MS was performed using an Easy nLC1000 UHPLC system directly coupled to an Orbitrap Elite mass spectrometer (Thermo Fisher). An integrated autosampler was used to load samples at 5  $\mu\text{L}/\text{min}$  onto a nanoViper trap column (75  $\mu\text{m}$  x 20 mm, Acclaim PepMap 100 C18 resin, 3  $\mu\text{m}$  particle size, 100Å pore size).

Reversed phase HPLC was performed using an EasySpray C18 column (75  $\mu\text{m}$  ID x 250 mm; Acclaim PepMap 100 C18 resin, 2  $\mu\text{m}$  particle size, 100 $\text{\AA}$  pore size). Mobile phases were Buffer A:  $\text{H}_2\text{O}:\text{DMSO}:\text{HCO}_2\text{H}$  (95:5:0.1; v/v/v) and Buffer B:  $\text{CH}_3\text{CN}:\text{DMSO}:\text{HCO}_2\text{H}$  (95:5:0.1; v/v/v). After 5 min of isocratic flow (200 nL/min, 2%B) a linear gradient from 2% to 35 %B was developed over 66 min, 35-80% B over 4 min, and isocratic flow at 80% for 5 min.

LC-MS/MS experiments were performed using data dependent acquisition with dynamic exclusion enabled (exclusion width =  $\pm 10$  ppm, repeat count = 2, repeat duration = 15 sec, exclusion duration 22.5 sec). MS1 scans were acquired in the Orbitrap mass analyzer (resolution 15,000 at m/z 400). The five most intense peptide ions from each survey scan were sequentially isolated and fragmented in the linear ion trap (isolation width = 2Da, normalized collision energy = 35%, activation Q = 0.25, AGC target =  $1.0 \times 10^4$ ).

Charge state exclusion enabled (1+,  $\geq 5+$ ).

Raw data files were analyzed using PEAKS Studio 8.5 bioinformatics package (Bioinformatic Solutions, Inc., Waterloo, ON). MS/MS spectra were searched against a custom database constructed from the SwissProt portion of the UniProt database (release 2019\_06). The database included all HUMAN sequences in SwissProt (20,471 sequences) and was augmented with reagent protein sequences (ASPN\_PSEFR, CLOS\_CLOHI, CTRA\_BOVIN, CTRB\_BOVIN, CTCR\_BOVIN, LYSC\_PSEAE, PNGF\_ELIMR, and TRYP\_PIG, SPA\_STAA8, SPA\_STAAU, SPG1\_STRSG, SPG2\_STRSG, GST26\_SCHJA, 3Xflag peptide).

Relevant search database parameters were: enzyme = trypsin/P, maximum missed cleavages = 2, fixed modifications = carbamidomethyl-Cys (C), variable modifications = N-acetyl (Protein), pyro-Glu (Q), and oxidation (M), precursor ion mass tolerance =  $\pm 10$  ppm, product ion mass tolerance = 0.6 Da, mass values = monoisotopic. Only high confidence peptide sequence assignments were accepted. Peptide validation False Discovery Rate < 1%. Protein ID based on  $\geq 2$  sibling peptides.

1. J. Beers *et al.*, Passaging and colony expansion of human pluripotent stem cells by enzyme-free dissociation in chemically defined culture conditions. *Nat Protoc* **7**, 2029-2040 (2012).
2. A. Swistowski *et al.*, Efficient generation of functional dopaminergic neurons from human induced pluripotent stem cells under defined conditions. *Stem Cells* **28**, 1893-1904 (2010).
3. A. Efthymiou *et al.*, Functional screening assays with neurons generated from pluripotent stem cell-derived neural stem cells. *J Biomol Screen* **19**, 32-43 (2014).
4. M. J. Berberich *et al.*, "Development of an On-Bead Digestion Procedure for Immunoprecipitated Proteins" in *Sample Preparation in Biological Mass Spectrometry*, A. R. Ivanov, A. V. Lazarev, Eds. (Springer Netherlands, Dordrecht, 2011), 10.1007/978-94-007-0828-0\_7, pp. 109-124.

## Supplementary Data

Supplemental figure 1

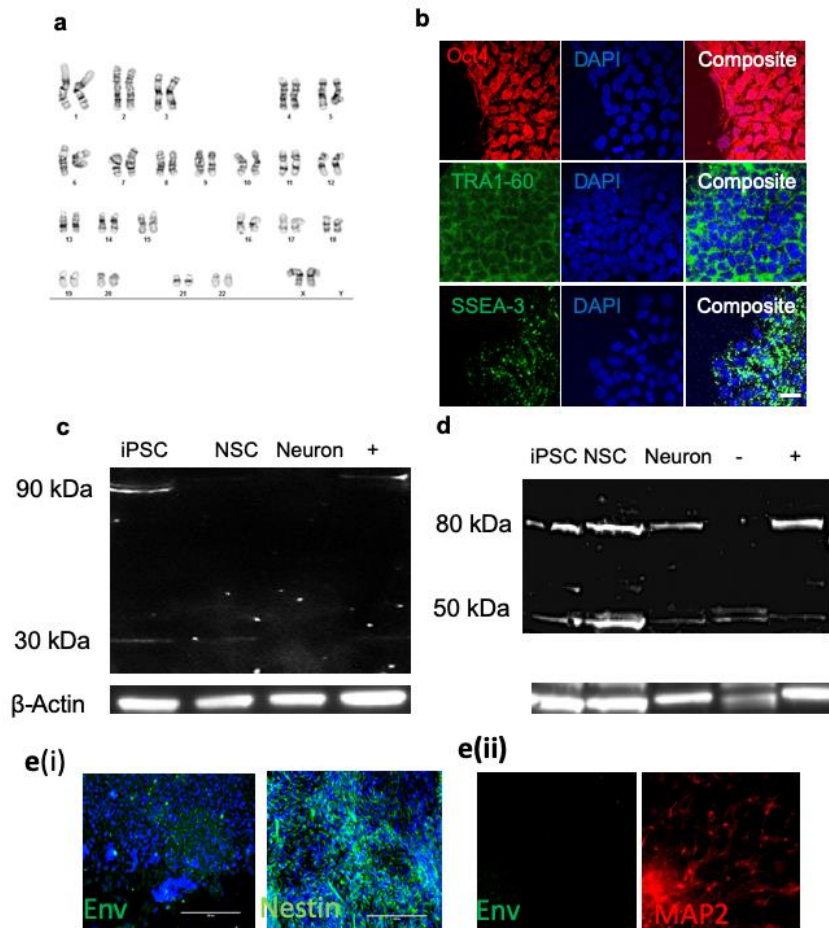

**Figure S1. Characterization of iPSC lines and detection of HERV-K protein expression by Western blot analysis.** iPSC lines were generated by transfecting CD34+ cells with Sendai virus containing Yamanaka factors.  
(a) Representative karyotyping of iPSC line PAU showed normal karyotype.

(b) Pluripotent stem cell markers, Oct4, TRA1-60 and SSEA-3 are shown by immunostaining. DAPI (blue) was used to stain the nuclei. Scale bar: 20  $\mu$ m.

(c) HERV-K Env and

(d) Gag protein expression in iPSC, neural stem cells (NSC) and neurons during differentiation was determined by Western-blot assays. Positive control (+) used recombinant protein. Negative control represents cell lysates from a mouse fibroblast cell line (-).  $\beta$ - actin was used as a loading control.

(e) (i) decreased HERV-K Env in NSC (immunostained for nestin; green) and (ii) lack of HERV-K Env in differentiated neurons (immunostained for MAP-2; red). DAPI (blue) was used to stain the nuclei.



Supplemental figure 2

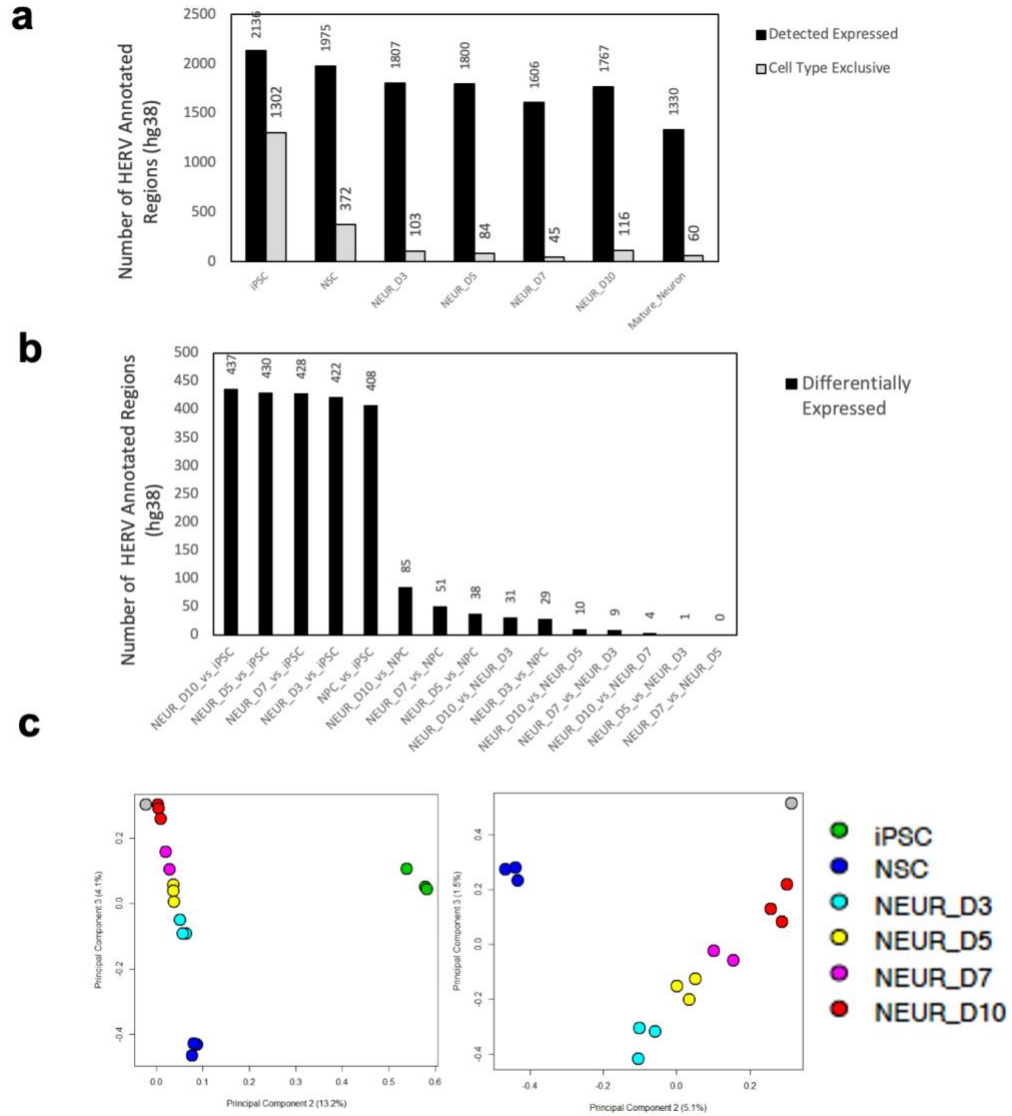

**Figure S2. Differential expression of HERVs in iPSC, NSC and neurons. (a)**

Following RNA seq analysis, 3,698 HERV annotated regions (RepeatMasker) of the Human Genome (hg38) were observed expressed in at least one cell type profiled with maximal expression in iPSC.

(b) 541 of the HERV regions observed expressed were found to have differential expression between one or more cell types (ANOVA corrected  $P < 0.05$ , TukeyHSD  $P < 0.05$ , absolute mean expression difference  $\geq 2X$ ).

(c) Inspection of cell type relationships by cov PCA using expression for the 541 HERV regions reveals good grouping within and between cell types; separating by differentiation stage and time.

Supplemental figure 3

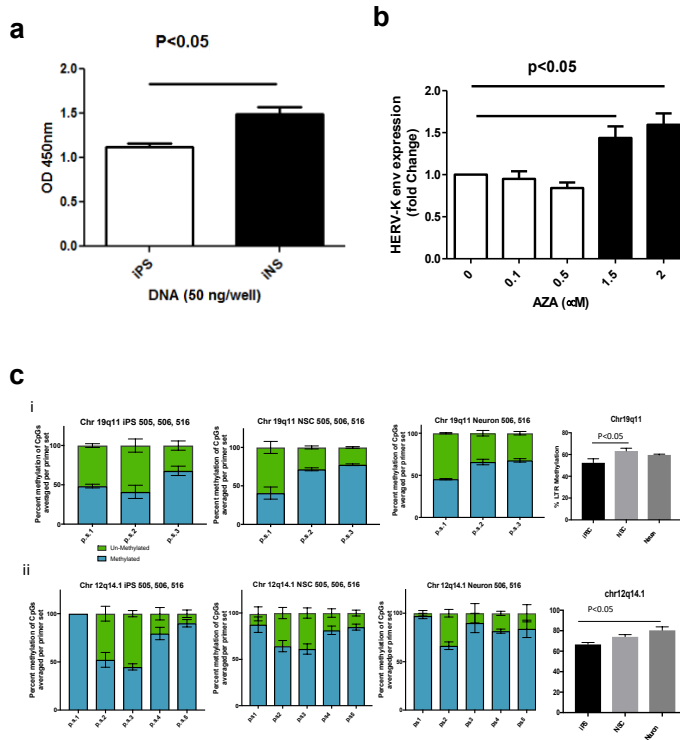

**Figure S3. HERV-K LTR methylation during neural differentiation.**

Global DNA methylation-LINE-1 kit was used to quantitate 5-methylcytosine levels in genomic DNA.

(a) global DNA methylation level was increased significantly in neural stem cells (iNS) differentiated from iPSCs ( $P < 0.05$ ).

(b) human neural stem cells treated with 5-aza-2'-deoxycytidine (AZA), which causes non-specific DNA demethylation, increased HML-2 Env expression after 24

hours. Data represent mean  $\pm$  SEM from three independent experiments. Statistical analysis was performed by one-way ANOVA followed by Bonferroni's test.

(c) Methylation in HML-2 LTR at loci on chromosomes 12q14.1 and 19q11. Graphs displaying percentage methylation for each primer set (p.s.) covering an LTR at either locus (i) 12q14.1 or (ii) 19q11 of iPSCs, NSCs or neurons from three donors (505, 506 and 516). Green denotes percentage of CpGs unmethylated and blue denotes percentage of CpGs with methylation. Summarized graphs of both loci showed that the methylation level increased significantly in NSCs or neurons compared to iPSCs. Data represents mean  $\pm$  SEM.

Supplemental figure 4

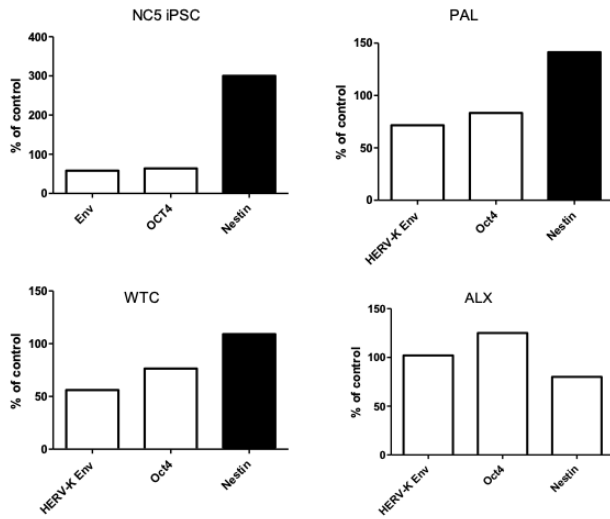

**Figure S4. Effect of HML-2 env siRNA on iPSC differentiation.** Inhibition of HML-2 *env* using siRNAs, on Oct3/4 and nestin transcripts in four different iPSC lines (NC5, PAL, WTC and ALX). In three of the lines where *env* was inhibited, there was increased nestin production at 24 hours.

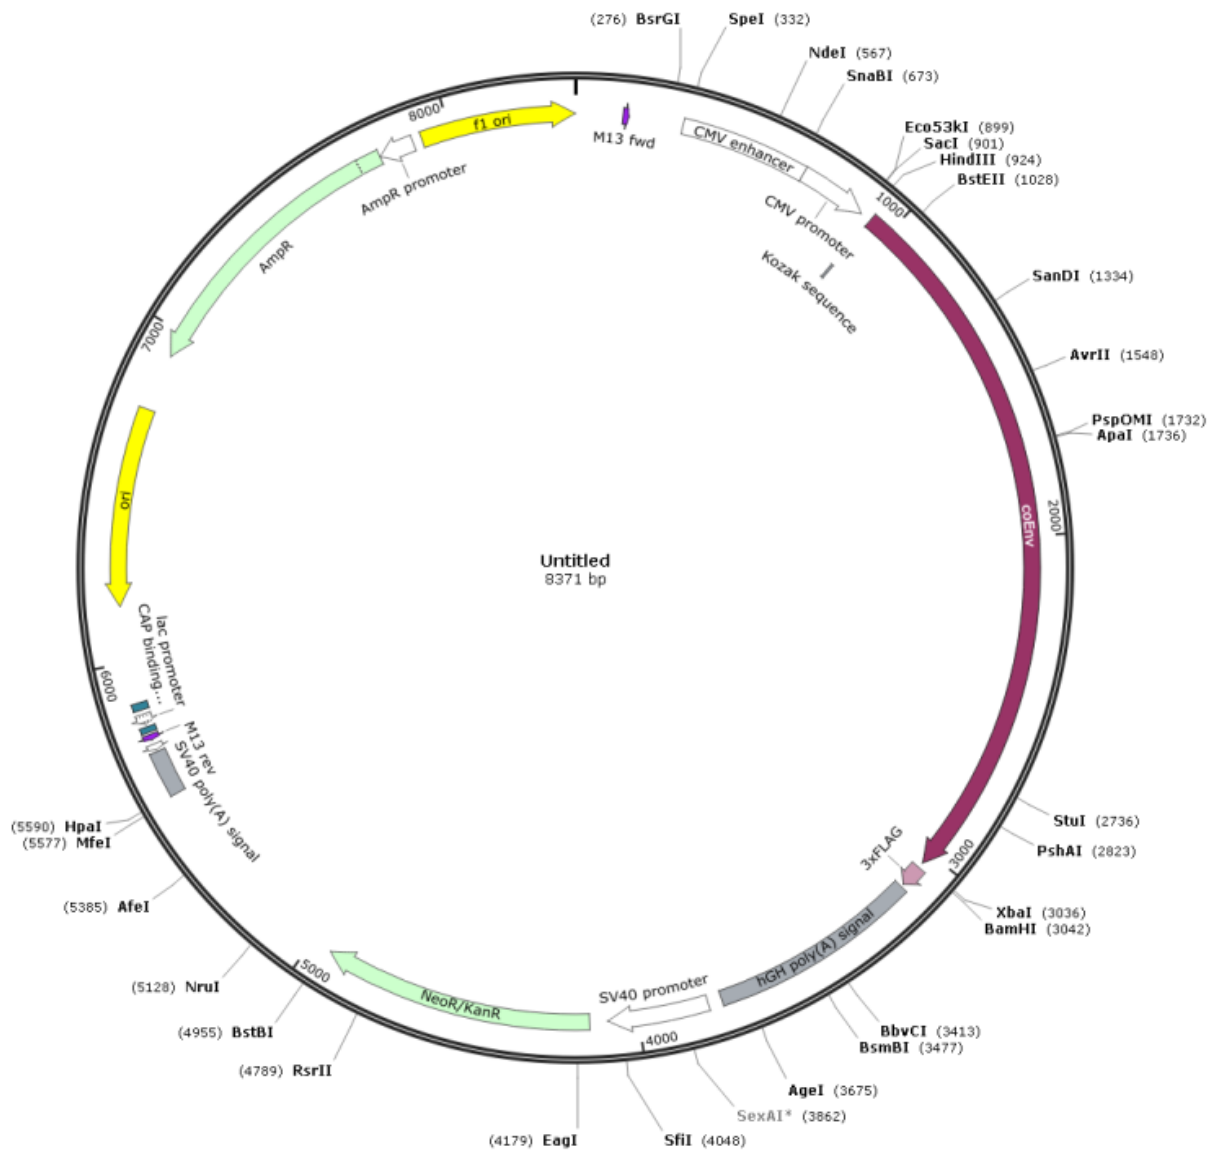

**Figure S5. Plasmid map for HML-2 *env*.** The consensus sequence of HML-2 *env* (coEnv) was inserted under a CMV promoter. The protein was linked to a FLAG tag. The consensus sequence of HML-2 *gag* was also used instead of HML-2 *env* for the plasmid construct of HML-2 *gag*.

Supplemental figure 6

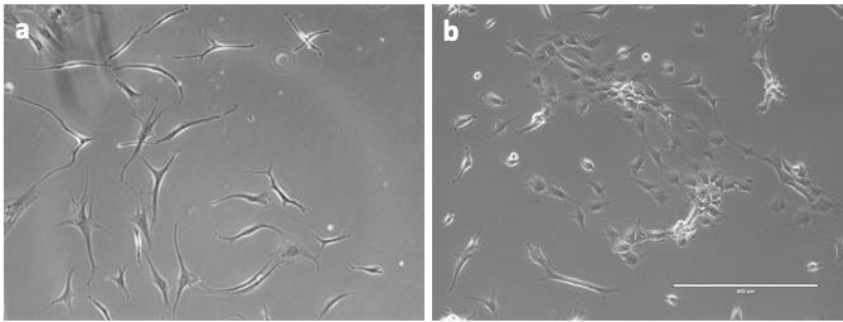

**Figure S6. Rhesus neural progenitor cells derived from fibroblasts.**

(a) Rhesus fibroblasts were transduced with Sendai virus containing Yamanaka factors and then incubated in neural induction medium for 2 weeks to produce (b) neural stem cells.

Supplemental figure 7

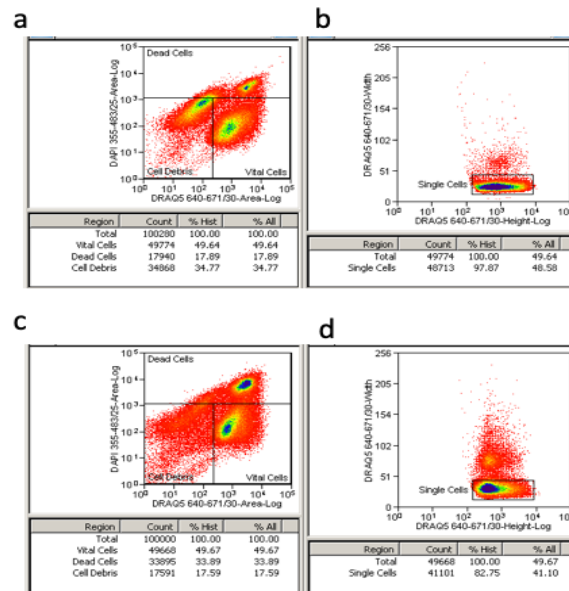

**Figure S7. FACS gating strategy.** The gates used for single cell gating of vital iPSCs for assaying HML2 Env and Tra1-60 expression are shown with DRAQ5-Area Log versus DAPI-Area Log, and DRAQ5-Height versus DRAQ5-Width bivariate plots (a and b, control staining without primary antibodies; c and d, with primary antibodies).



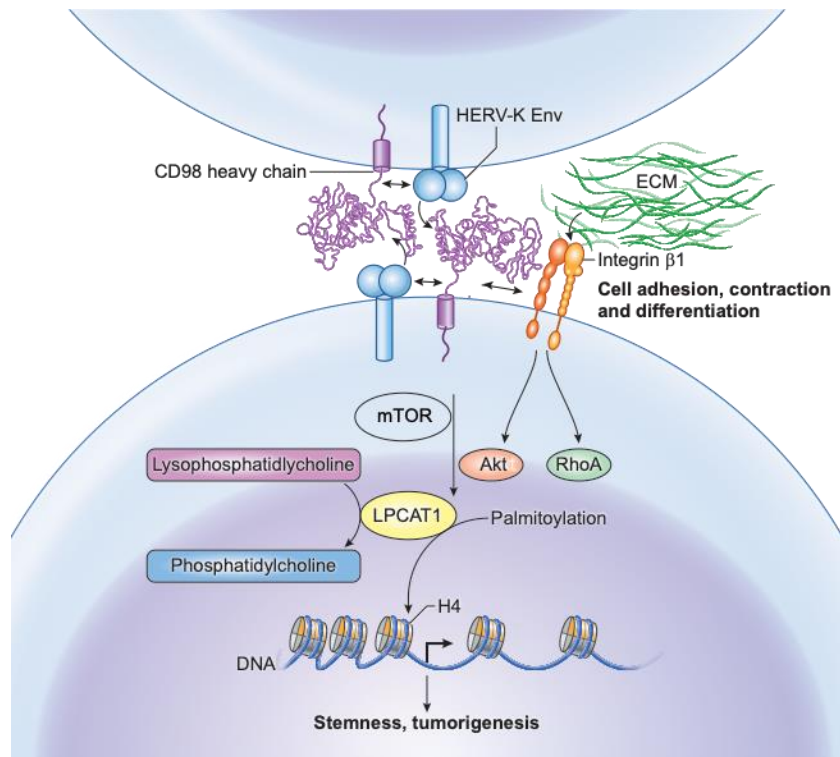

**Figure S8. Supplemental Schematic Figure: Mechanism underlying HERV-K subtype HML-2 Env function in human pluripotent stem cells.** Two pluripotent stem cells are shown in close vicinity. The HML-2 Env protein is expressed on their surfaces that binds to the CD98 heavy chain on the opposite cell. In the extracellular region, CD98 heavy chain binds to beta-1 integrin which in turn interacts with the extracellular matrix. Interactions between HML-2 Env and CD98 heavy chain also lead to activation of a cascade of secondary signaling molecules. This includes the mTOR pathway which is further linked to activation of LPCAT1. This enzyme can modulate the chromatin and maintain stemness by palmitoylation of histones. Silencing of this pathway is critical for differentiation of the pluripotent stem cells into neural progenitor cells and neuronal differentiation. Conversely, persistent activation of this pathway may lead to tumorigenesis.

**Table S1.** Characteristics of cell lines used in this study

**Table S2.** Sequences of small interfering (si) RNAs and PCR primers

**Table S3.** Reagents and resources.

**Table S4.** Summary of statistical analyses for individual figures

**Dataset S1.** Identification of HERV-K loci expressed in iPSC

**Dataset S2.** Proteins co-immunoprecipitated with HERV-K Env

**Dataset S3.** Genes regulated by HERV-K Env siRNA treatment in iPSC

**Supporting Video:** Treatment of antibody against HERV-K Env resulted in the detachment of iPSC colony in neural induction medium.

**Table S1. Characteristics of cell lines used in this study****iPSC lines used for RNA-Seq study**

| <b>Name</b> | <b>Origin</b>          | <b>Reprogramming method</b> | <b>Gender</b> | <b>Passage used</b> | <b>Reference</b>       |
|-------------|------------------------|-----------------------------|---------------|---------------------|------------------------|
| NCRM1       | CD34+ cord blood cells | Episomal                    | Male          | 18                  | Efthymiou et al., 2014 |
| NCRM5       | CD34+ cord blood cells | Episomal                    | Male          | 26                  | Efthymiou et al., 2014 |
| ND2.0       | Skin fibroblast        | Episomal                    | Male          | 31                  | Chen et al., 2011      |

**iPSC lines differentiated to neurons for Western-blot assay, immunostaining and RT-PCR.**

| <b>Name</b> | <b>Origin</b>           | <b>Reprogramming method</b> | <b>Gender</b> | <b>Passage used</b> |
|-------------|-------------------------|-----------------------------|---------------|---------------------|
| NC 4        | CD34+ cord blood        | Episomal                    | Male          | 16                  |
| WTC11       | Skin fibroblast         | Episomal                    | Male          | 35                  |
| ND2.0       | Skin fibroblast         | Episomal                    | Male          | 24                  |
| PAU         | CD34+ adult blood cells | Sendai virus                | Female        |                     |
| ALEX        | CD34+ adult blood cells | Sendai virus                | Male          |                     |

**NSC lines used in this study**

| <b>Name</b> | <b>Gender</b> | <b>Passage used</b> | <b>Used for RNA seq</b> | <b>Differentiated to neurons for RNA seq</b> |
|-------------|---------------|---------------------|-------------------------|----------------------------------------------|
| NCRM1       | Male          | 7                   | X                       | X                                            |
| BC1         | Male          | 6                   | X                       | X                                            |
| H14         | Male          | 6                   | X                       | X                                            |
| XCL1        | Male          | 6                   | X                       |                                              |

**iPSC lines used for neuronal differentiation for HERV-K LTR methylation study.**

| <b>Name</b> | <b>Origin</b>     | <b>Reprogramming method</b> | <b>Gender</b> | <b>Passage used</b> |
|-------------|-------------------|-----------------------------|---------------|---------------------|
| 505         | CD34+ adult blood | Sendai virus                | Male          | 5                   |

|     |                         |              |        |   |
|-----|-------------------------|--------------|--------|---|
| 506 | CD34+ adult blood cells | Sendai virus | Male   | 5 |
| 516 | CD34+ adult blood cells | Sendai virus | Female | 5 |

**Table S2a.** Sequences of small interfering (si) RNAs

| Name | Target    | Sequences                                                                 |
|------|-----------|---------------------------------------------------------------------------|
| Gi   | HERVK-gag | Sense5' UCCCAGUAACGUUAGAACCUU 3'<br>Antisense3' UUAGGGUCAUUGCAAUCUUGG 5'  |
| Ei 1 | HERVK-env | Sense5' CUGACGCAGUUAGCUACAAUU 3'<br>Antisense3' UUGACUGCGUCAAU CGAUGUU 5' |
| Ei 2 |           | Sense5' GAUUCACUUAUCACAUGGUUU 3'<br>Antisense3' UUCUAAGUGAAUAGUGUACCA 5'  |
| Ei 3 |           | Sense5' GGUUAAGACCAUUGGAAGUUU 3'<br>Antisense3' UUCAAUUCUGGUAACCUUCA 5'   |
| Ei 4 |           | Sense5' CAUCAAAAGCCCAUUUAAAUU 3'<br>Antisense3' UUGUAGUUUUCGGGUAUUUU 5'   |
| Ei 5 |           | Sense5' AGAACAU CGUUUCCAGUUAAU 3'<br>Antisense3' UUUCUUGUAGCAAAGGUCAAU 5' |

**S2b.** Sequences and LTR alignment of PCR primers

| Primer     | LTR alignment to chr12q14.1 LTR        | Primers for Bisulphite treated DNA |
|------------|----------------------------------------|------------------------------------|
| 12q14.1_1F | 5' of LTR beginning in LINE2b sequence | AAAGTTGAAAGGAGTAGTAA               |
| 12q14.1_1R | 141-165                                | CACAACACATATTTCAAAAAACAC           |
| 12q14.1_2F | 141-165                                | GTGTTTTTTGAAATATGTGTTGTG           |
| 12q14.1_2R | 446-462                                | AAACATTCCTTCCTCTTTTA               |
| 12q14.1_3F | 441-462                                | ATTAGTAAAAGAGGAAGGAATGT            |
| 12q14.1_3R | 700-723                                | CAACAAACAAACATATAACAAA             |
| 12q14.1_4F | 745-773                                | GTGATTTTGATATATTTTTTTTTYAG         |
| 12q14.1_4R | 941-956                                | AATAAATTACCCCTACACACCT             |
| Primer     | LTR alignment to chr19q11 LTR          |                                    |
| 19q11_1F   | 199-220                                | TAGAGTTAAATGGATTAAGGGT             |
| 19q11_1R   | 413-436                                | AACTAAAAACRATCAAATCTTTC            |
| 19q11_2F   | 468-489                                | ATTAGTAAAAGAGGAAGGAATGT            |
| 19q11_2R   | 748-776                                | CACAAAACAATTATAAAAAAAAAAATCAAC     |
| 19q11_3F   | 827-846                                | ATTAAGGGAATTTAGAGGTT               |
| 19q11_3R   | 956-971                                | ACTAATCAAAAACCTTTTTC               |

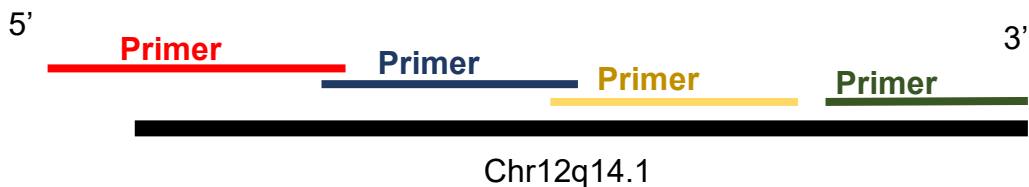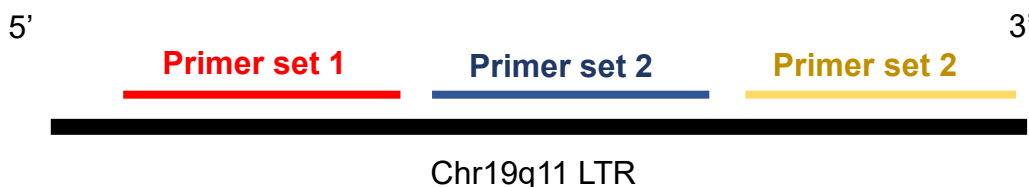

**Table S3. Reagents and resources**

| Reagent or Resource                                    | Source                    | Identifier                                           |
|--------------------------------------------------------|---------------------------|------------------------------------------------------|
| <b>Antibodies</b>                                      |                           |                                                      |
| mouse monoclonal anti-nestin                           | Abcam                     | Cat# ab22035, RRID:AB_446723, Lot# GR312885-12       |
| mouse monoclonal anti- $\beta$ -III-tubulin            | Promega                   | Cat# G7121, RRID:AB_430874, Lot# 0000206749          |
| rabbit anti-MAP2                                       | Abcam                     | Cat# ab32454, RRID:AB_776174, Lot# GR220420-1        |
| mouse anti-Human TRA-1-60 monoclonal IgM Antibody      | Abcam                     | Cat# ab16288, RRID:AB_778563, Lot# GR160693-1        |
| rat anti-SSEA-3 antibody                               | Millipore                 | Cat# MAB4303, RRID:AB_177628, Lot# NG1869267         |
| mouse monoclonal anti-CD98                             | Abcam                     | Cat# ab23495, RRID:AB_447477, Lot# GR3180054-3       |
| rabbit anti-LPCAT1                                     | Proteintech Group         | Cat# 16112-1-AP, RRID:AB_2135554, Lot# 00007409      |
| mouse monoclonal anti-HERV-K Env                       | Austral Biologicals       | Cat# HERM-1811-5, RRID:AB_10891119, Lot# MA180709HK4 |
| mouse monoclonal anti-HERV-K Env                       | Geneuro                   | ID# K06 GN                                           |
| rabbit anti-HERV-K Env                                 | GeneScript                | Custom made                                          |
| rabbit anti-HERV-K Gag                                 | GeneScript                | Custom made                                          |
| rabbit anti-S6 ribosomal protein                       | Cell Signaling Technology | Cat# 2217, RRID:AB_331355, Lot# 7                    |
| rabbit anti-phospho-S6 ribosomal protein ((Ser235/236) | Cell Signaling Technology | Cat# 4858, RRID:AB_916156, Lot# 16                   |
| mouse monoclonal anti-puromycin                        | Millipore                 | Cat# MABE343, RRID:AB_2566826, Lot# 3045550          |
| anti-Flag mAb                                          | Sigma                     | Cat# A8592, RRID: AB_439702, Lot# SLBV3799           |
| anti-mouse Alexa Fluor 488                             | Thermo Fisher             | Cat# A-11001, RRID:AB_2534069, Lot# 1484573          |
| anti-rabbit Alexa Fluor 594                            | Thermo Fisher             | Cat# A-11012, RRID:AB_2534079,                       |

|                                                          |                             |                                                 |
|----------------------------------------------------------|-----------------------------|-------------------------------------------------|
|                                                          |                             | Lot# 1596064                                    |
| anti-mouse IgM Alexa Flour 488                           | Thermo Fisher               | Cat# A21042, RRID:AB_141357, Lot# 1387726       |
| anti-mouse IgG Alexa Flour 546                           | Thermo Fisher               | Cat# A-11003, RRID:AB_2534071, Lot# 1885911     |
| Mouse IgG2a control antibody                             | Thermo Fisher               | Cat# MA1-10418, RRID:AB_2536786, Lot# QF2043478 |
| Monoclonal mouse-anti- $\beta$ actin                     | Sigma                       | Cat# A5441, RRID:AB_476744,                     |
| Monoclonal ouse anti-beta Tubulin                        | Millipore                   | Cat# 05-661, RRID: AB_309885, Lot# 2207268      |
| Peroxidase IgG Fraction Monoclonal Mouse Anti-Rabbit IgG | Jackson Immuno Research Lab | Cat# 211-032-171, RRID:AB_2339149, Lot# 115949  |
| <b>Cells</b>                                             |                             |                                                 |
| WA09-FI                                                  | WiCell                      | hPSC Reg ID: WAe009-A                           |
| Mouse (ICR) inactivated embryonic fibroblasts            | Thermo Fisher               | Cat# A24903                                     |
| HEK 293                                                  |                             |                                                 |
| <b>Kits</b>                                              |                             |                                                 |
| hES/iPS cell characterization kit                        | Applied Stemcell            | Cat# ASK-3006                                   |
| RNeasy Mini Kit                                          | Qiagen                      | Cat# 74104                                      |
| total RNA purification kit                               | Norgen                      | Cat# 17200                                      |
| QuantiTect reverse Transcription Kit                     | Qiagen                      | Cat# 205311                                     |
| Q5 High-Fidelity 2X Master Mix                           | New England Biolabs         | Cat# M0492S                                     |
| RNase-free DNase set                                     | Qiagen                      | Cat# 79254                                      |
| one step SensiFAST SYBR kit                              | Bioline                     | Cat# BIO-84005                                  |
| TOPO TA cloning kit                                      | Thermo Fisher               | Cat# K200040                                    |
| DNA purification kit                                     | Clontech                    | Cat# 746986.20                                  |
| Global DNA Methylation LINE-1 kit                        | Active Motif                | Cat# 55017                                      |

|                                                          |                       |                 |
|----------------------------------------------------------|-----------------------|-----------------|
| CellQuanti-blue cell viability assay kit                 | BioAssay Systems      | Cat# CQBL-05K   |
| TransIT-siQUEST® Transfection Reagent                    | Mirus                 | Cat# MIR2114    |
| Pierce RIPA buffer                                       | Thermo Fisher         | Cat# 89901      |
| CytoTune-iPS Reprogramming kit                           | Thermo Fisher         | Cat# A13780-01  |
| Pierce BCA protein assay kit                             | Thermo Fisher         | Cat# PD 202746  |
| Lipofectamine 3000                                       | Thermo Fisher         | Cat# L3000-008  |
| Dynabeads Protein G                                      | Thermo Fisher         | Cat# 10004D     |
| P3 Primary Cell 4D-Nucleofector® X kit (pmaxGFP plasmid) | Lonza                 | Cat# PBP3-02250 |
| Amersham ECL™ Western blotting detection reagents        | GE Healthcare         | Cat# RPN2106    |
| EasySep human progenitor cell enrichment kit             | StemCell Technologies | Cat# 19056      |

---

### Media and Supplements

---

|                                      |                       |               |
|--------------------------------------|-----------------------|---------------|
| Essential 8 Medium                   | Thermo Fisher         | Cat# A1517001 |
| PSC Neural induction medium          | Thermo Fisher         | Cat# A1647801 |
| StemSpan serum free expansion medium | StemCell Technologies | Cat# 09600    |
| IMDM                                 | Thermo Fisher         | Cat# 12440061 |
| NeuroBasal                           | Thermo Fisher         | Cat# 21103049 |
| DMEM/F12                             | Thermo Fisher         | Cat# 10565018 |
| B27 (+vitamin A)                     | Thermo Fisher         | Cat# 17504044 |
| N2                                   | Thermo Fisher         | Cat# 1780240  |
| NEAA                                 | ThermoFisher          | Cat# 11140-50 |
| GlutaMax                             | Thermo Fisher         | Cat# 35050061 |
| Antibiotic antimycotic               | Thermo Fisher         | Cat# 15240062 |
| Recombinant human BDNF               | Peprotech             | Cat# 450-02   |
| Recombinant human GDNF               | Peprotech             | Cat# 450-10   |
| Recombinant human TPO                | Peprotech             | Cat# 300-18   |

---



---

|                                     |               |                |
|-------------------------------------|---------------|----------------|
| Recombinant human Flt-3 ligand      | Peprotech     | Cat# 300-19    |
| Recombinant human SCF               | Peprotech     | Cat# 300-07    |
| Recombinant human IL-6              | Peprotech     | Cat# 200-06    |
| Recombinant human IL-7              | Peprotech     | Cat# 200-07    |
| Matrigel (Growth factor reduced)    | Corning       | Cat# 354230    |
| PDL                                 | Sigma         | Cat# P6407-5MG |
| Accutase cell dissociation solution | Thermo Fisher | Cat# A11105-01 |
| Cyclic AMP                          | Sigma         | Cat# A9501     |
| Fetal bovine serum                  | Gemini        | Cat#100-106    |
| L-Ascorbic acid                     | Sigma         | Cat# A92902    |

---

#### **Chemicals and solutions**

---

|                                                |                       |                    |
|------------------------------------------------|-----------------------|--------------------|
| DAPI                                           | Roche                 | Cat# 10236276001   |
| DRAQ5                                          | Thermo                | Cat# 62251         |
| EDTA                                           | Mediatech             | Cat# 46-034-CL     |
| DPBS                                           | Thermo Fisher         | Cat# 14190-136     |
| Saponin                                        | Sigma                 | Cat# 47036         |
| paraformaldehyde                               | EMS                   | Cat# 15710         |
| Triton X-100                                   | AmericanBio           | Cat# AB02025-00100 |
| Tween-20                                       | Sigma                 | Cat# P2287-500ML   |
| Glycerol                                       | Fisher<br>Bioreagents | Cat# BP229-1       |
| Goat serum                                     | Sigma                 | Cat# G9023-10ML    |
| Non-fat milk                                   | BioWorld              | Cat# 30620074-2    |
| BSA                                            | Sigma                 | Cat# A2153-50G     |
| complete proteinase inhibitor cocktail tablets | Roche                 | Cat# 11873580001   |
| phosphatase inhibitor cocktail 3               | Sigma                 | Cat# P0044         |
| 4-10% Tris-glycine polyacrylamide gels         | Invitrogen            | Cat# NP0335        |

---

|                          |                               |                 |
|--------------------------|-------------------------------|-----------------|
| SizeSelect™ Agarose Gels | Invitrogen                    | Cat# G661012    |
| Rapamycin                | Sigma                         | Cat# R8781      |
| Puromycin                | Sigma                         | Cat# P8833      |
| <b>Services</b>          | <b>Company or Institution</b> | <b>Location</b> |
| iPSC karyotyping         | WiCell                        | Madison, WI     |
| RNA-Seq                  | New York<br>Genome Center     | New York, NY    |
| iPSC generation          | NHLBI iPSC<br>Core Facility   | Bethesda, MD    |
| FACS                     | NIH FACS Core<br>Facility     | Bethesda, MD    |
| PCR product sequencing   | Genewiz                       | Frederick, MD   |
|                          | Eurofins<br>Genomics          | Louisville, KY  |

Table S4. Summary of statistical analyses

| Figure number | Test used                                                  | n | Descriptive stats             | P value    | Degrees of freedom & F/t value | Post hoc multiple comparisons test |
|---------------|------------------------------------------------------------|---|-------------------------------|------------|--------------------------------|------------------------------------|
| 1a            | One sample two tailed t-test                               | 4 | Error bars are mean $\pm$ SEM | P=0.0009   | t(3)=13.18                     |                                    |
| 1b            | One sample two tailed t-test                               | 4 | Error bars are mean $\pm$ SEM | P=0.0001   | t(3)=25.51                     |                                    |
| 1c            | One sample two tailed t-test                               | 5 | Error bars are mean $\pm$ SEM | P =0.0002  | t(4)=13.43                     |                                    |
| 1d bar2       | paired two-tailed Student's t-test                         | 4 | Error bars are mean $\pm$ SEM | P =0.0001  | t(3)=25.71                     |                                    |
| 1d bar3       | paired two-tailed Student's t-test                         | 3 | Error bars are mean $\pm$ SEM | P =0.0053  | t(2)=13.69                     |                                    |
| 3a            | paired two-tailed Student's t-test                         | 3 | Error bars are mean $\pm$ SEM | P =0.0463  | t(2)=4.486                     |                                    |
| 3b            | One way RM ANOVA and Bonferroni's multiple comparison test | 3 | Error bars are mean $\pm$ SEM | P = 0.0319 | F(2,2)=9.206                   | P>0.05                             |
| 3c            | one-way RM ANOVA and Bonferroni's multiple comparison test | 3 | Error bars are mean $\pm$ SEM | P=0.0132   | F(2,2)=15.43                   | Ei vs Nsi <0.05                    |
| 3e            | paired two-tailed Student's t-test                         | 3 | Error bars are mean $\pm$ SEM | P=0.0212   | t(2)=6.765                     |                                    |
| 3f            | paired two-tailed Student's t-test                         | 3 | Error bars are mean $\pm$ SEM | P=0.0171   | t(2)=7.554                     |                                    |
| 4b            | one-way RM ANOVA and Bonferroni's multiple comparison test | 3 | Error bars are mean $\pm$ SEM | P = 0.0136 | F(2,2)=15.15                   | Vs ctrl: P <0.05<br>Vs Nsi: P<0.05 |
| 5c            | paired two-tailed Student's t-test                         | 3 | Error bars are mean $\pm$ SEM | P = 0.0137 | t(2)=8.459                     |                                    |

|       |                                                            |   |                               |            |              |                                              |
|-------|------------------------------------------------------------|---|-------------------------------|------------|--------------|----------------------------------------------|
| 7g    | Student's t-test                                           | 3 | Error bars are mean $\pm$ SEM | P=0.0281   | t(2)=5.837   |                                              |
| S3a   | paired two-tailed Student's t-test                         | 3 | Error bars are mean $\pm$ SEM | P=0.0123   | t(2)=8.931   |                                              |
| S3b   | one-way RM ANOVA and Bonferroni's multiple comparison test | 3 | Error bars are mean $\pm$ SEM | P = 0.0002 | F(4,2)=6.625 | 1.5 $\mu$ M: P < 0.05<br>2 $\mu$ M: P < 0.05 |
| S3ci  | unpaired one-tailed Student's t-test                       | 3 | Error bars are mean + SEM     | P=0.0352   | t(4)=2.451   |                                              |
| S3cii | One way ANOVA and Dunnett's multiple comparison test       | 3 | Error bars are mean + SEM     | P=0.0225   | F(2,5)=8.899 | P<0.05                                       |
